# Supplementary material for: The Impact of a Risk-Based Breast Cancer Screening Decision Aid on Initiation of Mammography Among Younger Women: Report of a Randomized Trial
Source: PubMed Central journal article supplement — MDM Policy Pract. 2019 Jan 17;4(1):2381468318812889. doi: 10.1177/2381468318812889 (PMC6350139; doi:10.1177/2381468318812889), 2019-01-17
Supplement: DS_10.1177_2381468318812889.pdf [file DS_10.1177_2381468318812889.pdf]

|                                                                                                                                                                                                                                                                                                                                        |                                                                                                                                                                                                                                                                                                                                         |                                                                          |
|----------------------------------------------------------------------------------------------------------------------------------------------------------------------------------------------------------------------------------------------------------------------------------------------------------------------------------------|-----------------------------------------------------------------------------------------------------------------------------------------------------------------------------------------------------------------------------------------------------------------------------------------------------------------------------------------|--------------------------------------------------------------------------|
| <b>Penn Center for Innovation in Personalized Screening</b><br> <b>Perelman</b><br><b>School of Medicine</b><br>UNIVERSITY of PENNSYLVANIA                                                                                                            |                                                                                                                                                                                                                                                                                                                                         | <b>Name</b> _____<br><b>Today's Date</b> _____<br><b>ID Number</b> _____ |
| Thank you for participating in the Decide2Screen Study. This Follow-Up Survey is an important part of the study. The survey should take up to 15 minutes. By taking the survey, you will provide information that will help us create tools to help women make better health decisions. Thank you for your willingness to participate! |                                                                                                                                                                                                                                                                                                                                         |                                                                          |
| <b>What is your date of birth?</b>                                                                                                                                                                                                                                                                                                     |                                                                                                                                                                                                                                                                                                                                         | Month _____ Day _____ Year _____                                         |
| <b>What is your marital status?</b><br><input type="checkbox"/> Married <input type="checkbox"/> Divorced<br><input type="checkbox"/> Widowed <input type="checkbox"/> Never been married                                                                                                                                              | <b>What is the highest level of education you have completed?</b><br><input type="checkbox"/> Less than High School <input type="checkbox"/> Some college or technical school<br><input type="checkbox"/> High school graduate or GED <input type="checkbox"/> College graduate or beyond                                               |                                                                          |
| <b>At this point in time, have you made a decision about the age at which you will start having mammograms?</b><br><input type="checkbox"/> No <input type="checkbox"/> Yes                                                                                                                                                            | <b>At what age do you plan to have your first mammogram? Select "age" and enter the age in numbers below or select one of the other options below:</b><br><input type="checkbox"/> Age: _____<br><input type="checkbox"/> I don't know when I will have my first mammogram<br><input type="checkbox"/> I never plan to have a mammogram |                                                                          |
| <b>In the past two months, have you talked with your healthcare provider about mammograms?</b><br><input type="checkbox"/> No <input type="checkbox"/> Yes                                                                                                                                                                             | <b>In the past two months, have you received an order for a mammogram (an order is a referral to a radiologist that is needed to schedule a mammogram)?</b><br><input type="checkbox"/> No <input type="checkbox"/> Yes                                                                                                                 |                                                                          |
| <b>Have you had a mammogram in the past two months?</b><br><input type="checkbox"/> No <input type="checkbox"/> Yes                                                                                                                                                                                                                    | <b>Do you have a mammogram scheduled?</b><br><input type="checkbox"/> No <input type="checkbox"/> Yes                                                                                                                                                                                                                                   |                                                                          |

Thinking about the past 2 months, did you ***actively look*** for information about mammograms from doctors, from other people, or from the media (including the internet)?

No       Yes       I don't recall

If yes, were you ***actively looking for information*** about mammograms in the past 2 months from any of the following sources?

|                                       |                             |                              |
|---------------------------------------|-----------------------------|------------------------------|
| Doctor or other medical professional  | <input type="checkbox"/> No | <input type="checkbox"/> Yes |
| Family, friends, or coworkers         | <input type="checkbox"/> No | <input type="checkbox"/> Yes |
| Television or radio                   | <input type="checkbox"/> No | <input type="checkbox"/> Yes |
| Newspapers, magazines, or newsletters | <input type="checkbox"/> No | <input type="checkbox"/> Yes |
| The Internet                          | <input type="checkbox"/> No | <input type="checkbox"/> Yes |
| Other source (please list):           | _____                       |                              |

If you were ***actively looking for information*** about mammograms on ***the internet*** in the past 2 months, did you use any of the following websites to look for this information?

|                                                                                 |                             |                              |
|---------------------------------------------------------------------------------|-----------------------------|------------------------------|
| www.webmd.com (WebMD)                                                           | <input type="checkbox"/> No | <input type="checkbox"/> Yes |
| www.cancer.gov (National Cancer Institute at the National Institutes of Health) | <input type="checkbox"/> No | <input type="checkbox"/> Yes |
| www.komen.org (Susan G. Komen for the Cure)                                     | <input type="checkbox"/> No | <input type="checkbox"/> Yes |
| www.cancer.org (American Cancer Society)                                        | <input type="checkbox"/> No | <input type="checkbox"/> Yes |
| Online social networks (such as Facebook)                                       | <input type="checkbox"/> No | <input type="checkbox"/> Yes |
| www.mayoclinic.org (Mayo Clinic)                                                | <input type="checkbox"/> No | <input type="checkbox"/> Yes |

**Do all women who have an abnormal mammogram have breast cancer?**

No       Yes  
 I don't know

**Do mammograms detect every breast cancer?**

No       Yes  
 I don't know

**Which of the following age groups will have the most extra tests, biopsies, or procedures as a result of having mammograms?**

40-49       Age makes no difference  
 50-59       I don't know

**Can mammograms detect breast cancer when it is an early stage?**

No       Yes  
 I don't know

**For what age group are more deaths prevented by mammograms?**

40-49       Age makes no difference  
 50-59       I don't know

**For which group(s) are mammograms most beneficial?**

40-49       Age makes no difference  
 50-59       I don't know

If you have made a decision about when to start having mammograms, think about that decision, and answer the questions below. For each statement below, select the answer corresponding to how much you agree or disagree.

|                                                                         | Strongly Disagree        | Disagree                 | Neither Agree nor Disagree | Agree                    | Strongly Agree           |
|-------------------------------------------------------------------------|--------------------------|--------------------------|----------------------------|--------------------------|--------------------------|
| I am satisfied that my decision was consistent with my personal values. | <input type="checkbox"/> | <input type="checkbox"/> | <input type="checkbox"/>   | <input type="checkbox"/> | <input type="checkbox"/> |
| The decision I made was the best decision possible for me personally.   | <input type="checkbox"/> | <input type="checkbox"/> | <input type="checkbox"/>   | <input type="checkbox"/> | <input type="checkbox"/> |

|                                                                                         |                          |                          |                          |                          |                          |
|-----------------------------------------------------------------------------------------|--------------------------|--------------------------|--------------------------|--------------------------|--------------------------|
| I am satisfied with my decision.                                                        | <input type="checkbox"/> |
| I am satisfied that I am adequately informed about the issues important to my decision. | <input type="checkbox"/> |
| I am satisfied that this was my decision to make.                                       | <input type="checkbox"/> |
| I expect to successfully carry out (or continue to carry out) the decision I made.      | <input type="checkbox"/> |

**The following statements refer to making a decision about when to start having mammograms. For each statement below, select the answer corresponding to how much you agree or disagree.**

**When I think about making a decision about when to start having mammograms...**

|                                                                                              | Strongly Disagree        | Disagree                 | Neither Agree nor Disagree | Agree                    | Strongly Agree           |
|----------------------------------------------------------------------------------------------|--------------------------|--------------------------|----------------------------|--------------------------|--------------------------|
| I am clear about which is more important to me (the benefits or the risks and side effects). | <input type="checkbox"/> | <input type="checkbox"/> | <input type="checkbox"/>   | <input type="checkbox"/> | <input type="checkbox"/> |
| I am clear about which benefits matter most to me.                                           | <input type="checkbox"/> | <input type="checkbox"/> | <input type="checkbox"/>   | <input type="checkbox"/> | <input type="checkbox"/> |
| I feel sure about what to choose.                                                            | <input type="checkbox"/> | <input type="checkbox"/> | <input type="checkbox"/>   | <input type="checkbox"/> | <input type="checkbox"/> |
| I expect to stick with my decision.                                                          | <input type="checkbox"/> | <input type="checkbox"/> | <input type="checkbox"/>   | <input type="checkbox"/> | <input type="checkbox"/> |
| I am satisfied with my decision.                                                             | <input type="checkbox"/> | <input type="checkbox"/> | <input type="checkbox"/>   | <input type="checkbox"/> | <input type="checkbox"/> |
| I am clear about which risks and side effects matter most.                                   | <input type="checkbox"/> | <input type="checkbox"/> | <input type="checkbox"/>   | <input type="checkbox"/> | <input type="checkbox"/> |
| I know the benefits of each option.                                                          | <input type="checkbox"/> | <input type="checkbox"/> | <input type="checkbox"/>   | <input type="checkbox"/> | <input type="checkbox"/> |
| I am choosing without pressure from others.                                                  | <input type="checkbox"/> | <input type="checkbox"/> | <input type="checkbox"/>   | <input type="checkbox"/> | <input type="checkbox"/> |
| I feel I have made an informed choice.                                                       | <input type="checkbox"/> | <input type="checkbox"/> | <input type="checkbox"/>   | <input type="checkbox"/> | <input type="checkbox"/> |
| This decision is easy for me to make.                                                        | <input type="checkbox"/> | <input type="checkbox"/> | <input type="checkbox"/>   | <input type="checkbox"/> | <input type="checkbox"/> |
| My decision shows what is important to me.                                                   | <input type="checkbox"/> | <input type="checkbox"/> | <input type="checkbox"/>   | <input type="checkbox"/> | <input type="checkbox"/> |
| I am clear about the best choice for me.                                                     | <input type="checkbox"/> | <input type="checkbox"/> | <input type="checkbox"/>   | <input type="checkbox"/> | <input type="checkbox"/> |
| I have enough support from others to make a choice.                                          | <input type="checkbox"/> | <input type="checkbox"/> | <input type="checkbox"/>   | <input type="checkbox"/> | <input type="checkbox"/> |
| I have enough advice to make a choice.                                                       | <input type="checkbox"/> | <input type="checkbox"/> | <input type="checkbox"/>   | <input type="checkbox"/> | <input type="checkbox"/> |
| I know the risks and side effects of each option.                                            | <input type="checkbox"/> | <input type="checkbox"/> | <input type="checkbox"/>   | <input type="checkbox"/> | <input type="checkbox"/> |
| I know which options are available to me.                                                    | <input type="checkbox"/> | <input type="checkbox"/> | <input type="checkbox"/>   | <input type="checkbox"/> | <input type="checkbox"/> |

|                                                                                                                                                                                                                                                                                              |                                                                                                                                                                                                                                                                  |                                                                                                                                                                                                                                                                                                                                                      |                                                                                                                                                                                                                                                                                                  |
|----------------------------------------------------------------------------------------------------------------------------------------------------------------------------------------------------------------------------------------------------------------------------------------------|------------------------------------------------------------------------------------------------------------------------------------------------------------------------------------------------------------------------------------------------------------------|------------------------------------------------------------------------------------------------------------------------------------------------------------------------------------------------------------------------------------------------------------------------------------------------------------------------------------------------------|--------------------------------------------------------------------------------------------------------------------------------------------------------------------------------------------------------------------------------------------------------------------------------------------------|
| <p><b>How often do you worry about getting breast cancer someday?</b></p> <p><input type="checkbox"/> Not at all      <input type="checkbox"/> Often<br/> <input type="checkbox"/> Rarely      <input type="checkbox"/> Almost all<br/> <input type="checkbox"/> Sometimes      the time</p> | <p><b>How much does your worry affect your mood?</b></p> <p><input type="checkbox"/> Not at all      <input type="checkbox"/> Somewhat<br/> <input type="checkbox"/> A little      <input type="checkbox"/> A lot</p>                                            | <p><b>How much does your worry affect your ability to perform your daily activities?</b></p> <p><input type="checkbox"/> Not at all      <input type="checkbox"/> Somewhat<br/> <input type="checkbox"/> A little      <input type="checkbox"/> A lot</p>                                                                                            |                                                                                                                                                                                                                                                                                                  |
| <p><b>What do you think is your chance of developing breast cancer <i>in the next 10 years</i> out of 1000? Please choose a number between 0 and 1000.</b></p> <p>_____</p>                                                                                                                  | <p><b>What do you think is your chance of developing breast cancer <i>in your lifetime</i> out of 1000? Please choose a number between 0 and 1000.</b></p> <p>_____</p>                                                                                          | <p><b>Select the answer that best completes the following statement. My chances of having breast cancer in the next 10 years are...</b></p> <p><input type="checkbox"/> Higher than the average woman my age<br/> <input type="checkbox"/> The same as the average woman my age<br/> <input type="checkbox"/> Less then the average woman my age</p> |                                                                                                                                                                                                                                                                                                  |
| <p><b>How good are you at working with fractions?</b></p> <p><input type="checkbox"/> 1 – Not at all good<br/> <input type="checkbox"/> 2<br/> <input type="checkbox"/> 3<br/> <input type="checkbox"/> 4<br/> <input type="checkbox"/> 5 – Extremely good</p>                               | <p><b>How good are you at working with percentages?</b></p> <p><input type="checkbox"/> 1 – Not at all good<br/> <input type="checkbox"/> 2<br/> <input type="checkbox"/> 3<br/> <input type="checkbox"/> 4<br/> <input type="checkbox"/> 5 – Extremely good</p> | <p><b>How good are you at calculating a 15% tip?</b></p> <p><input type="checkbox"/> 1 – Not at all good<br/> <input type="checkbox"/> 2<br/> <input type="checkbox"/> 3<br/> <input type="checkbox"/> 4<br/> <input type="checkbox"/> 5 – Extremely good</p>                                                                                        | <p><b>How good are you at figuring out how much a shirt will cost if it is 25% off?</b></p> <p><input type="checkbox"/> 1 – Not at all good<br/> <input type="checkbox"/> 2<br/> <input type="checkbox"/> 3<br/> <input type="checkbox"/> 4<br/> <input type="checkbox"/> 5 – Extremely good</p> |
| <p><b>When reading the newspaper, how helpful do you find tables and graphs that are part of a story?</b></p>                                                                                                                                                                                |                                                                                                                                                                                                                                                                  | <p>Not at all helpful</p> <p><input type="checkbox"/></p>                                                                                                                                                                                                                                                                                            | <p>Extremely helpful</p> <p><input type="checkbox"/></p>                                                                                                                                                                                                                                         |
| <p><b>When people tell you the chance of something happening, do you prefer they use words (“it rarely happens”) or numbers (“there’s a 1% chance”)?</b></p>                                                                                                                                 |                                                                                                                                                                                                                                                                  | <p>Always prefer words</p> <p><input type="checkbox"/></p>                                                                                                                                                                                                                                                                                           | <p>Always prefer percentages</p> <p><input type="checkbox"/></p>                                                                                                                                                                                                                                 |
| <p><b>When you hear a weather forecast, do you prefer predictions using only words (e.g., “there is a small chance of rain today”) or predictions using percentages (e.g., “there will be a 20% chance of rain today”)?</b></p>                                                              |                                                                                                                                                                                                                                                                  | <p>Always prefer words</p> <p><input type="checkbox"/></p>                                                                                                                                                                                                                                                                                           | <p>Always prefer percentages</p> <p><input type="checkbox"/></p>                                                                                                                                                                                                                                 |



Thank you for participating in this survey. Do you have any comments or questions for us?

Thank you again for your participation in this survey. Your responses will help us create tools to help women make better health decisions. We would be happy to answer any questions you may have. You can contact us at [decide2screen@asc.upenn.edu](mailto:decide2screen@asc.upenn.edu) or 215-573-4739.

Marilyn Schapira, MD  
Project Lead

Table: Association Between Participant Characteristics and Survey Response

|                                                    | OR  | 95% CI     | p     |
|----------------------------------------------------|-----|------------|-------|
| Race = Non-Black, (Ref = Black)                    | 5.5 | (2.0,18.0) | <0.01 |
| Study Arm = Intervention, (Ref = Control)          | 0.7 | (0.3,1.4)  | 0.32  |
| Age (years)                                        | 0.9 | (0.8,1.0)  | 0.08  |
| Clinic = Internal medicine (Ref = Family Practice) | 1.3 | (0.6,2.8)  | 0.46  |
| Clinic = Ob/Gyn (Ref = Family Practice)            | 1.3 | (0.6,3.2)  | 0.50  |
| Lifetime Gail Risk                                 | 1.1 | (1.0,1.2)  | 0.18  |
| Race x Study Arm Interaction                       | 0.7 | (0.2,2.7)  | 0.60  |

Footnote: Logistic regression analysis of association between participant characteristics and survey response. Results indicate that black women were significantly less likely to complete the survey than non-black women, but this effect did not differ between study arms. Women in the control arm were non-statistically significantly more likely to complete the survey than women in the intervention arm regardless of race.
